# Supplementary material for: Therapeutic effects of long-circulating miR-135a-containing cationic immunoliposomes against gallbladder carcinoma
Source: PubMed Central journal article supplement (PMC5519676; doi:10.1038/s41598-017-06234-8), 2017-07-20
Supplement: 41598_2017_6234_MOESM1_ESM.pdf [file 41598_2017_6234_MOESM1_ESM.pdf]

**Therapeutic effects of long-circulating  
miR-135a-containing cationic immunoliposomes against  
gallbladder carcinoma**

Guanghua Yang, Baobing Yin

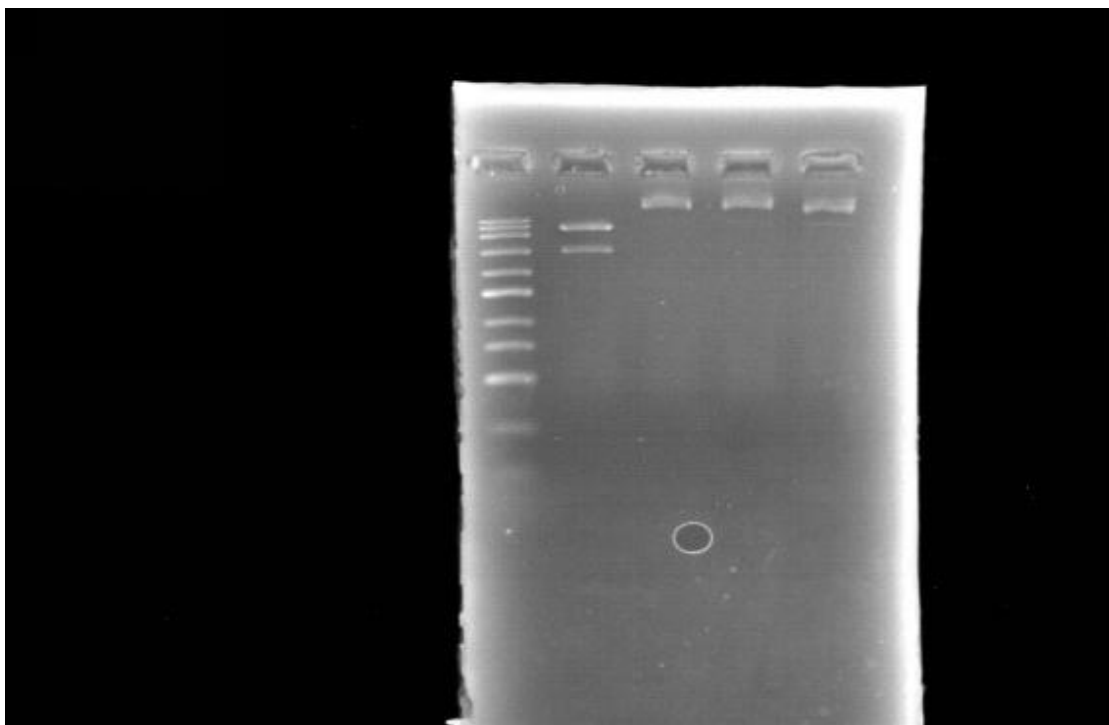

Supplementary figure 1. The full-length gels of Figure 2A
